# Supplementary material
Source: HighWire-hosted journal article supplement (https://bibliotheek.ehb.be/content/76/4/360)

Supplementary Figure S1. Flow-chart for study sample.

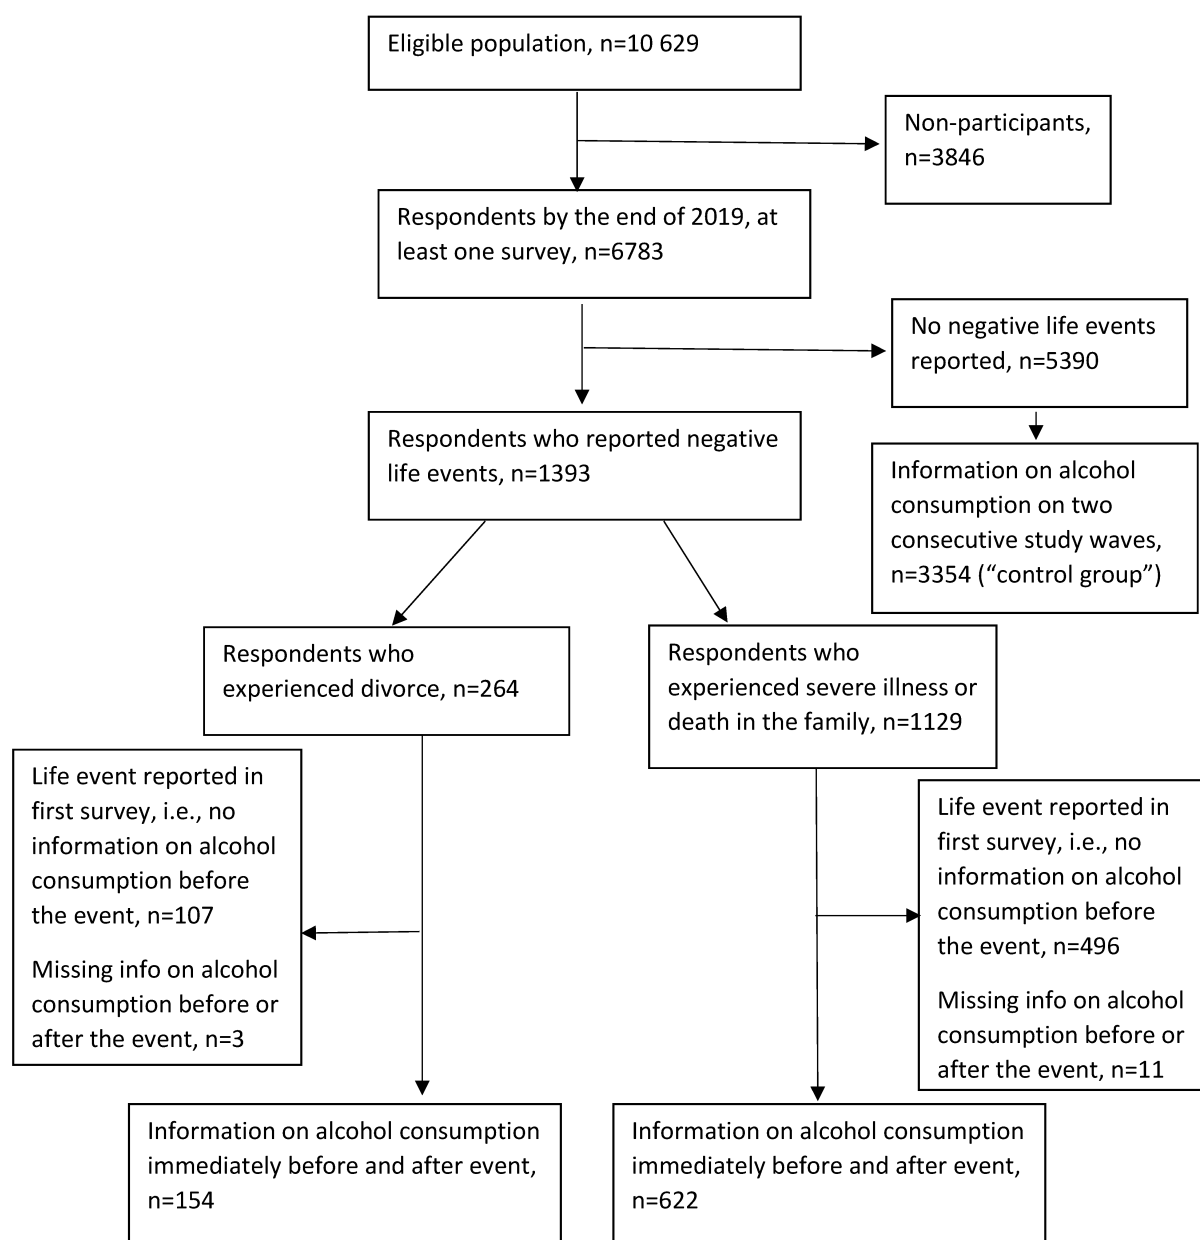

Supplement: inline-supplementary-material-1 [file inline-supplementary-material-1.pdf]
