# Supplementary material
Source: HighWire-hosted journal article supplement (https://bibliotheek.ehb.be/content/76/4/360)
Supplement: inline-supplementary-material-2 [file inline-supplementary-material-2.pdf]

## SUPPLEMENTARY TABLES AND FIGURES

Supplementary Table S1. Model fit statistics of the latent trajectory analysis from polynomial models with 1 to 3 trajectories for different life events.

| Number of trajectories         | Polynomial order* | BIC†           | AIC            | Log-likelihood | Average posterior probabilities | Smallest group (%) |
|--------------------------------|-------------------|----------------|----------------|----------------|---------------------------------|--------------------|
| Illness or death in the family |                   |                |                |                |                                 |                    |
| 1                              | 3                 | -792.73        | -783.87        | -779.87        | 1                               | 100                |
| 2                              | 33                | -498.67        | -478.72        | -469.72        | 0.996/0.975                     | 11.3               |
| 3                              | 333               | -512.28        | -481.25        | -467.25        | 0.985/0.865/0.963               | 2.7                |
| 3                              | 133               | -504.23        | -477.63        | -465.63        | 0.956/0.819/0.985               | 7                  |
| <b>3</b>                       | <b>123</b>        | <b>-501.35</b> | <b>-467.97</b> | <b>-465.97</b> | <b>0.954/0.826/0.977</b>        | <b>7.2</b>         |
| Divorce                        |                   |                |                |                |                                 |                    |
| 1                              | 3                 | -235.96        | -229.89        | -225.89        | 1                               | 100                |
| 2                              | 33                | -159.36        | -145.69        | -136.69        | 0.993/0.961                     | 15                 |
| 3                              | 333               | -170.1         | -148.84        | -134.84        | 0.938/0.955/0.955               | 8.6                |
| 3                              | 133               | -165.58        | -147.36        | -135.36        | 0.980/0.709/0.968               | 3.7                |
| <b>3</b>                       | <b>123</b>        | <b>-162.79</b> | <b>-146.09</b> | <b>-135.09</b> | <b>0.926/0.899/0.980</b>        | <b>12</b>          |

Notes: BIC = Bayesian Information Criterion values; AIC = Akaike Information Criterion values.

\*Polynomial function 1 refers to linear, 2 to quadratic and 3 to cubic shape of trajectory. The selected trajectory solutions are bolded. † BIC value is based on the number of individuals.
