# Supplementary material
Source: HighWire-hosted journal article supplement (https://bibliotheek.ehb.be/content/76/4/360)
Supplement: inline-supplementary-material-3 [file inline-supplementary-material-3.pdf]

Supplementary Table S2. Characteristics of individuals belonging to the three trajectories of heavy drinking among those experiencing illness or death in the family.

|                              | No heavy drinking<br>(n=535) | Decreasing heavy<br>drinking<br>(n=24) | Constant heavy<br>drinking<br>(n=63) |
|------------------------------|------------------------------|----------------------------------------|--------------------------------------|
| Age in years, mean (SD)      | 63.7 (1.5)                   | 64.3 (1.2)                             | 63.9 (1.7)                           |
| Gender, %                    |                              |                                        |                                      |
| Men                          | 69.0                         | 2.3                                    | 28.7                                 |
| Women                        | 88.8                         | 4.1                                    | 7.1                                  |
| Marital status, %            |                              |                                        |                                      |
| Married / cohabiting         | 86.2                         | 4.2                                    | 9.6                                  |
| Not married / cohabiting     | 84.6                         | 2.7                                    | 12.7                                 |
| Occupational status, %       |                              |                                        |                                      |
| High                         | 80.9                         | 5.0                                    | 14.1                                 |
| Intermediate                 | 87.7                         | 3.2                                    | 9.1                                  |
| Low                          | 89.2                         | 3.0                                    | 7.8                                  |
| Neighborhood disadvantage, % |                              |                                        |                                      |
| Low                          | 85.6                         | 3.6                                    | 10.8                                 |
| High                         | 86.7                         | 3.7                                    | 9.6                                  |
| Work status, %               |                              |                                        |                                      |
| Full-time work               | 87.3                         | 2.0                                    | 10.7                                 |
| Part-time work or retired    | 85.2                         | 5.2                                    | 9.6                                  |
| Depression diagnosis, %      |                              |                                        |                                      |
| No                           | 87.0                         | 4.6                                    | 8.5                                  |
| Yes                          | 81.0                         | 1.9                                    | 17.1                                 |
| Anxiety, %                   |                              |                                        |                                      |
| Low                          | 86.8                         | 4.0                                    | 9.2                                  |
| High                         | 78.3                         | 3.3                                    | 18.3                                 |
| Social network size, %       |                              |                                        |                                      |
| > 10                         | 85.7                         | 4.1                                    | 10.2                                 |
| ≤ 10                         | 88.2                         | 2.6                                    | 9.2                                  |
| Smoking, %                   |                              |                                        |                                      |
| Never or former              | 87.4                         | 3.7                                    | 9.0                                  |
| Current                      | 71.9                         | 6.3                                    | 21.9                                 |
