# Supplementary material
Source: HighWire-hosted journal article supplement (https://bibliotheek.ehb.be/content/76/4/360)
Supplement: inline-supplementary-material-4 [file inline-supplementary-material-4.pdf]

Supplementary Table S3. Characteristics of individuals belonging to the three trajectories of heavy drinking among those experiencing a divorce.

|                              | No heavy drinking<br>(n=124) | Decreasing heavy<br>drinking<br>(n=10) | Constant heavy<br>drinking<br>(n=20) |
|------------------------------|------------------------------|----------------------------------------|--------------------------------------|
| Age in years, mean (SD)      | 63.6 (1.5)                   | 64.2 (1.4)                             | 63.7 (1.9)                           |
| Gender, %                    |                              |                                        |                                      |
| Men                          | 56.0                         | 16.0                                   | 28.0                                 |
| Women                        | 85.3                         | 4.7                                    | 10.1                                 |
| Occupational status, %       |                              |                                        |                                      |
| High                         | 68.3                         | 9.8                                    | 22.0                                 |
| Intermediate                 | 88.9                         | 3.7                                    | 7.4                                  |
| Low                          | 82.8                         | 6.9                                    | 10.3                                 |
| Neighborhood disadvantage, % |                              |                                        |                                      |
| Low                          | 75.9                         | 6.0                                    | 18.1                                 |
| High                         | 87.3                         | 7.3                                    | 5.5                                  |
| Work status, %               |                              |                                        |                                      |
| Full-time work               | 81.8                         | 3.0                                    | 15.2                                 |
| Part-time work or retired    | 79.3                         | 9.2                                    | 11.5                                 |
| Depression diagnosis, %      |                              |                                        |                                      |
| No                           | 84.9                         | 4.7                                    | 10.4                                 |
| Yes                          | 62.1                         | 10.3                                   | 27.6                                 |
| Anxiety, %                   |                              |                                        |                                      |
| Low                          | 81.8                         | 6.1                                    | 12.1                                 |
| High                         | 68.4                         | 10.5                                   | 21.1                                 |
| Social network size, %       |                              |                                        |                                      |
| > 10                         | 81.9                         | 6.3                                    | 11.8                                 |
| ≤ 10                         | 72.0                         | 8.0                                    | 20.0                                 |
| Smoking, %                   |                              |                                        |                                      |
| Never or former              | 81.5                         | 7.7                                    | 10.8                                 |
| Current                      | 71.4                         | 0.0                                    | 28.6                                 |
